# Supplementary figures and images for: E-cadherin loss drives diffuse-type gastric tumorigenesis via EZH2-mediated reprogramming
Source: PubMed Central journal article supplement — J Exp Med. 2024 Feb 27;221(4):e20230561. doi: 10.1084/jem.20230561 (PMC10899090; doi:10.1084/jem.20230561), 2024-02-27

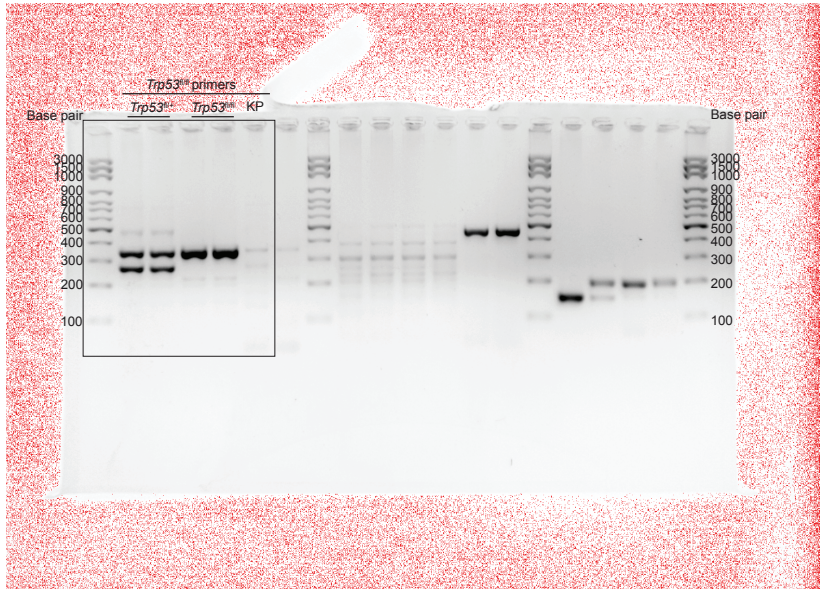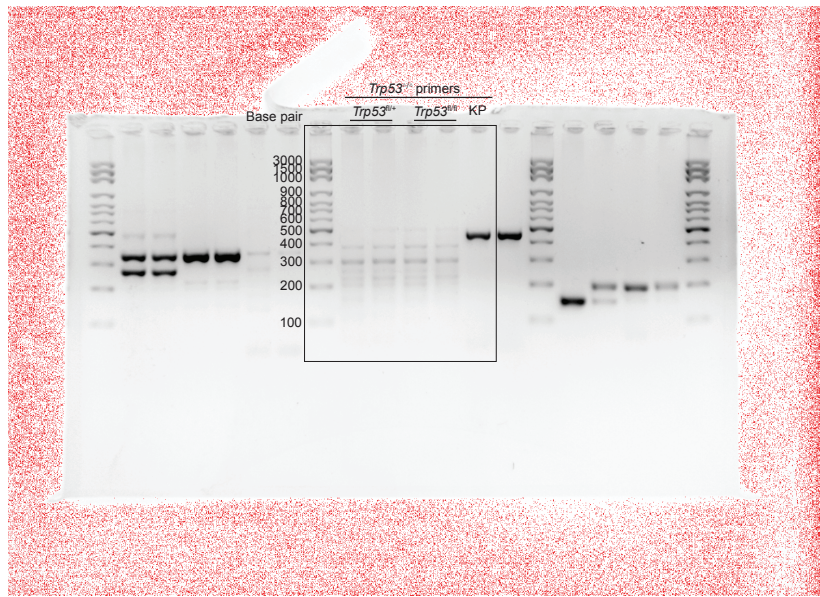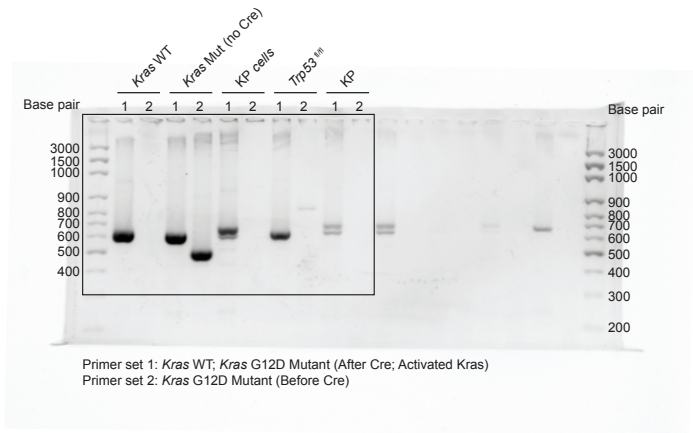

Supplement: JEM_20230561_SourceDataFS4.pdf [file JEM_20230561_SourceDataFS4.pdf]
